# Supplementary material for: Ganglioside Profiling of the Human Retina: Comparison with Other Ocular Structures, Brain and Plasma Reveals Tissue Specificities
Source: PubMed Central journal article supplement (PMC5173345; doi:10.1371/journal.pone.0168794), 2016-12-20
Supplement: pone.0168794.s001.pdf [file pone.0168794.s001.pdf]

**S1 Table. Molecular species of the ganglioside classes detected with the QqQ and the LTQ-Orbitrap mass spectrometers in the retina and other ocular tissues, brain and plasma.** The QqQ mass spectrometer was operated in negative ion mode and the LTQ-Orbitrap mass spectrometer was operated in positive ion mode. MM, theoretical molecular mass. +, detected; -, non-detected.

| Ceramide   | MM       | Retina | RPE/choroid | Ciliary body | Optic nerve | Brain | Plasma |
|------------|----------|--------|-------------|--------------|-------------|-------|--------|
| <b>GM3</b> |          |        |             |              |             |       |        |
| 32:2       | 1122.666 | -      | -           | -            | -           | -     | +      |
| 32:1       | 1124.682 | +      | +           | +            | -           | +     | +      |
| 34:2       | 1150.698 | -      | +           | +            | -           | -     | +      |
| 34:1       | 1152.713 | +      | +           | +            | +           | +     | +      |
| 36:2       | 1178.729 | +      | +           | +            | +           | +     | +      |
| 36:1       | 1180.744 | +      | +           | +            | +           | +     | +      |
| 37:1       | 1194.760 | +      | -           | -            | -           | -     | -      |
| 38:2       | 1206.760 | +      | +           | +            | +           | +     | +      |
| 38:1       | 1208.776 | +      | +           | +            | +           | +     | +      |
| 39:1       | 1222.791 | +      | -           | +            | +           | -     | +      |
| 40:3       | 1232.775 | -      | +           | +            | -           | -     | +      |
| 40:2       | 1234.791 | +      | +           | +            | +           | +     | +      |
| 40:1       | 1236.807 | +      | +           | +            | +           | +     | +      |
| 41:2       | 1248.807 | -      | -           | +            | -           | -     | +      |
| 41:1       | 1250.823 | +      | +           | +            | +           | +     | +      |
| 42:3       | 1260.807 | -      | +           | +            | +           | -     | -      |
| 42:2       | 1262.823 | +      | +           | +            | +           | +     | +      |
| 42:1       | 1264.838 | +      | +           | +            | +           | +     | +      |
| 43:2       | 1276.838 | -      | -           | -            | -           | +     | +      |
| 43:1       | 1278.854 | -      | -           | -            | +           | -     | +      |
| 44:2       | 1290.854 | -      | +           | -            | +           | -     | -      |
| <b>GM2</b> |          |        |             |              |             |       |        |
| 32:1       | 1327.761 | -      | -           | -            | -           | +     | -      |
| 34:2       | 1353.777 | -      | -           | -            | -           | -     | +      |
| 34:1       | 1355.793 | +      | +           | +            | +           | +     | +      |
| 36:2       | 1381.808 | +      | +           | +            | +           | +     | +      |
| 36:1       | 1383.824 | +      | +           | +            | +           | +     | +      |
| 38:2       | 1409.839 | +      | +           | +            | +           | +     | +      |
| 38:1       | 1411.855 | +      | +           | +            | +           | +     | +      |
| 39:1       | 1425.871 | +      | -           | -            | -           | -     | -      |
| 40:2       | 1437.871 | +      | +           | +            | -           | -     | +      |
| 40:1       | 1439.886 | +      | +           | +            | +           | +     | +      |
| 42:3       | 1463.886 | -      | +           | +            | -           | -     | +      |
| 42:2       | 1465.902 | -      | +           | +            | +           | +     | +      |
| 42:1       | 1467.918 | -      | +           | +            | +           | +     | +      |
| 43:2       | 1479.917 | -      | -           | -            | +           | -     | -      |
| 43:1       | 1481.933 | -      | -           | -            | +           | -     | -      |
| 44:2       | 1493.933 | -      | -           | -            | +           | -     | -      |

| <b>GM1</b>   |          |   |   |   |   |   |   |
|--------------|----------|---|---|---|---|---|---|
| 32:1         | 1489.814 | - | - | - | - | - | + |
| 34:2         | 1515.830 | - | - | - | - | - | + |
| 34:1         | 1517.845 | - | + | + | + | + | + |
| 36:2         | 1543.861 | - | - | - | - | + | + |
| 36:1         | 1545.877 | + | + | + | + | + | + |
| 38:2         | 1571.892 | - | - | - | + | + | + |
| 38:1         | 1573.908 | + | + | + | + | + | + |
| 40:2         | 1599.924 | - | + | - | + | - | + |
| 40:1         | 1601.939 | + | + | + | + | + | + |
| 42:3         | 1625.939 | - | + | - | + | - | - |
| 42:2         | 1627.955 | + | + | + | + | + | - |
| 42:1         | 1629.971 | - | - | + | - | + | - |
| 43:2         | 1641.970 | - | - | - | + | - | - |
| 44:2         | 1655.986 | - | - | - | + | - | - |
| <b>GD3</b>   |          |   |   |   |   |   |   |
| 32:2         | 1413.761 | - | - | - | - | - | + |
| 32:1         | 1415.777 | - | + | + | - | - | + |
| 34:2         | 1441.793 | - | + | + | - | - | + |
| 34:1         | 1443.809 | + | + | + | + | + | + |
| 36:2         | 1469.824 | + | + | + | + | + | + |
| 36:1         | 1471.840 | + | + | + | + | + | + |
| 37:1         | 1485.855 | + | - | - | - | - | - |
| 38:2         | 1497.856 | + | + | + | + | + | + |
| 38:1         | 1499.871 | + | + | + | + | + | + |
| 39:1         | 1513.887 | - | - | + | - | - | - |
| 40:2         | 1525.887 | + | + | + | + | + | + |
| 40:1         | 1527.902 | + | + | + | + | + | + |
| 41:2         | 1539.902 | - | - | + | - | - | - |
| 41:1         | 1541.918 | - | + | + | + | - | + |
| 42:3         | 1551.902 | - | + | + | - | - | + |
| 42:2         | 1553.918 | + | + | + | + | + | + |
| 42:1         | 1555.934 | + | + | + | + | + | + |
| 43:1         | 1569.949 | - | - | - | + | - | - |
| 44:2         | 1581.949 | - | - | - | + | - | - |
| <b>AcGD3</b> |          |   |   |   |   |   |   |
| 34:1         | 1485.819 | + | - | + | + | - | - |
| 36:2         | 1511.835 | + | - | - | + | - | - |
| 36:1         | 1513.850 | + | - | + | + | + | - |
| 38:2         | 1539.866 | + | - | + | - | + | - |
| 38:1         | 1541.882 | + | - | + | + | + | - |
| 40:2         | 1567.897 | + | - | + | - | + | - |
| 40:1         | 1569.913 | + | - | + | + | + | - |
| 41:1         | 1583.929 | - | - | + | - | - | - |
| 42:3         | 1593.913 | - | - | + | - | - | - |
| 42:2         | 1595.929 | - | - | + | - | - | - |
| 42:1         | 1597.944 | - | - | + | - | - | - |

| <b>GD2</b>    |          |   |   |   |   |   |   |
|---------------|----------|---|---|---|---|---|---|
| <b>34:1</b>   | 1646.888 | + | - | + | + | + | + |
| <b>36:2</b>   | 1672.904 | + | - | - | - | + | - |
| <b>36:1</b>   | 1674.919 | + | - | + | + | + | + |
| <b>38:2</b>   | 1700.935 | + | - | - | - | + | - |
| <b>38:1</b>   | 1702.951 | + | - | + | + | + | + |
| <b>40:2</b>   | 1728.966 | - | - | - | - | - | - |
| <b>40:1</b>   | 1730.982 | + | - | + | - | + | - |
| <b>42:2</b>   | 1756.998 | - | - | + | - | + | - |
| <b>42:1</b>   | 1759.006 | - | - | + | - | - | - |
| <b>GD1a</b>   |          |   |   |   |   |   |   |
| <b>32:1</b>   | 1780.909 | - | - | + | - | - | + |
| <b>34:2</b>   | 1806.925 | - | - | + | - | - | + |
| <b>34:1</b>   | 1808.941 | + | + | + | - | + | + |
| <b>36:2</b>   | 1834.956 | + | + | + | + | + | + |
| <b>36:1</b>   | 1836.972 | + | + | + | + | + | + |
| <b>38:2</b>   | 1862.988 | + | + | + | + | + | + |
| <b>38:1</b>   | 1865.003 | + | + | + | + | + | + |
| <b>39:1</b>   | 1879.019 | - | - | - | + | - | - |
| <b>40:2</b>   | 1891.019 | + | + | + | + | - | + |
| <b>40:1</b>   | 1893.035 | + | + | + | + | + | + |
| <b>41:2</b>   | 1905.034 | - | - | + | - | - | - |
| <b>41:1</b>   | 1907.050 | - | - | + | + | - | + |
| <b>42:3</b>   | 1917.034 | - | + | + | + | - | - |
| <b>42:2</b>   | 1919.050 | + | + | + | + | + | + |
| <b>42:1</b>   | 1921.066 | + | + | + | + | + | + |
| <b>43:1</b>   | 1935.082 | - | - | - | + | - | - |
| <b>44:2</b>   | 1947.082 | - | - | - | + | - | - |
| <b>GD1b</b>   |          |   |   |   |   |   |   |
| <b>34:1</b>   | 1808.941 | + | + | + | + | - | + |
| <b>36:2</b>   | 1834.956 | + | - | - | + | + | - |
| <b>36:1</b>   | 1836.972 | + | + | + | + | + | + |
| <b>38:2</b>   | 1862.988 | + | - | - | + | + | - |
| <b>38:1</b>   | 1865.003 | + | + | + | + | + | + |
| <b>40:2</b>   | 1891.019 | + | + | + | - | - | + |
| <b>40:1</b>   | 1893.035 | + | + | + | + | + | + |
| <b>41:1</b>   | 1907.050 | - | - | + | + | - | + |
| <b>42:3</b>   | 1917.034 | - | - | - | + | - | - |
| <b>42:2</b>   | 1919.050 | + | + | + | + | + | + |
| <b>42:1</b>   | 1921.066 | + | + | + | + | + | + |
| <b>43:1</b>   | 1935.082 | - | - | - | + | - | - |
| <b>44:2</b>   | 1947.082 | - | - | - | + | - | - |
| <b>AcGD1b</b> |          |   |   |   |   |   |   |
| <b>36:2</b>   | 1876.967 | + | - | - | - | + | - |
| <b>36:1</b>   | 1878.983 | + | - | - | + | + | - |
| <b>38:1</b>   | 1907.014 | + | - | - | + | + | - |
| <b>40:1</b>   | 1935.046 | + | - | - | - | + | - |

| <b>GT3</b>    |          |   |   |   |   |   |   |
|---------------|----------|---|---|---|---|---|---|
| <b>34:1</b>   | 1734.904 | + | - | - | - | - | - |
| <b>36:2</b>   | 1760.920 | + | - | - | - | + | - |
| <b>36:1</b>   | 1762.935 | + | - | - | - | + | - |
| <b>38:2</b>   | 1788.951 | + | - | - | - | - | - |
| <b>38:1</b>   | 1790.967 | + | - | - | - | + | - |
| <b>40:2</b>   | 1816.982 | + | - | - | - | - | - |
| <b>40:1</b>   | 1818.998 | + | - | - | - | - | - |
| <b>42:2</b>   | 1845.014 | + | - | - | - | - | - |
| <b>42:1</b>   | 1847.029 | + | - | - | - | - | - |
| <b>AcGT3</b>  |          |   |   |   |   |   |   |
| <b>34:1</b>   | 1776.915 | + | - | - | - | - | - |
| <b>36:2</b>   | 1802.930 | + | - | - | - | - | - |
| <b>36:1</b>   | 1804.946 | + | - | - | - | + | - |
| <b>38:2</b>   | 1830.962 | + | - | - | - | + | - |
| <b>38:1</b>   | 1832.977 | + | - | - | - | + | - |
| <b>40:2</b>   | 1858.993 | + | - | - | - | - | - |
| <b>40:1</b>   | 1861.008 | + | - | - | - | - | - |
| <b>42:2</b>   | 1887.024 | + | - | - | - | - | - |
| <b>42:1</b>   | 1889.040 | + | - | - | - | - | - |
| <b>GT1b</b>   |          |   |   |   |   |   |   |
| <b>32:1</b>   | 2072.005 | - | - | - | - | - | + |
| <b>34:2</b>   | 2098.021 | - | - | - | - | - | + |
| <b>34:1</b>   | 2100.036 | + | + | + | + | + | + |
| <b>36:2</b>   | 2126.052 | + | - | + | - | - | + |
| <b>36:1</b>   | 2128.067 | + | + | + | + | + | + |
| <b>38:2</b>   | 2154.083 | + | - | + | - | + | + |
| <b>38:1</b>   | 2156.099 | + | + | + | + | + | + |
| <b>39:1</b>   | 2170.114 | - | - | - | + | - | - |
| <b>40:2</b>   | 2182.114 | - | + | + | + | - | + |
| <b>40:1</b>   | 2184.130 | + | + | + | + | + | + |
| <b>41:1</b>   | 2198.146 | - | - | + | + | - | + |
| <b>42:3</b>   | 2208.130 | - | + | + | - | - | + |
| <b>42:2</b>   | 2210.146 | + | + | + | + | - | + |
| <b>42:1</b>   | 2212.161 | + | + | + | + | + | + |
| <b>43:1</b>   | 2226.177 | - | + | - | + | - | - |
| <b>44:2</b>   | 2238.177 | - | - | - | + | - | - |
| <b>AcGT1b</b> |          |   |   |   |   |   |   |
| <b>34:1</b>   | 2141.047 | - | - | + | - | - | - |
| <b>36:2</b>   | 2168.062 | - | - | - | - | + | - |
| <b>36:1</b>   | 2170.078 | + | - | + | + | + | + |
| <b>38:1</b>   | 2198.109 | + | - | + | + | + | + |
| <b>40:1</b>   | 2226.141 | + | - | + | + | + | - |
| <b>42:2</b>   | 2252.156 | - | - | + | - | - | - |
| <b>42:1</b>   | 2254.172 | - | - | + | - | - | - |
| <b>GQ1b</b>   |          |   |   |   |   |   |   |
| <b>34:1</b>   | 2391.132 | + | - | - | - | - | - |

|               |          |   |   |   |   |   |   |
|---------------|----------|---|---|---|---|---|---|
| <b>36:2</b>   | 2417.147 | + | - | - | - | + | - |
| <b>36:1</b>   | 2419.163 | + | + | + | + | + | + |
| <b>38:2</b>   | 2445.179 | + | - | - | - | + | - |
| <b>38:1</b>   | 2447.194 | + | + | + | + | + | + |
| <b>40:2</b>   | 2473.210 | + | - | + | + | - | - |
| <b>40:1</b>   | 2475.226 | + | - | + | + | + | - |
| <b>42:2</b>   | 2501.241 | + | - | - | + | - | - |
| <b>42:1</b>   | 2503.257 | + | - | + | + | - | - |
| <b>AcGQ1b</b> |          |   |   |   |   |   |   |
| <b>36:1</b>   | 2461.174 | + | - | - | + | + | - |
| <b>38:1</b>   | 2489.205 | + | - | - | + | + | - |
| <b>40:1</b>   | 2517.237 | - | - | - | + | - | - |
