# Supplementary material for: Ganglioside Profiling of the Human Retina: Comparison with Other Ocular Structures, Brain and Plasma Reveals Tissue Specificities
Source: PubMed Central journal article supplement (PMC5173345; doi:10.1371/journal.pone.0168794), 2016-12-20
Supplement: pone.0168794.s002.pdf [file pone.0168794.s002.pdf]

**S2 Table. Molecular species profile of the ganglioside classes of the retina and other ocular tissues, brain and plasma.** Data were obtained by operating the QqQ mass spectrometer in negative SRM mode. The percentage of each ceramide species was expressed relatively to the sum of all detected species in its specific GG class, every GG class being considered separately. Molecular species accounting for less than 1% were grouped under the category “others”. Results are given as mean and standard deviation of 4 to 7 independent samples for each tissue, injected three times. N.D.: Non-detected (S/N<3); <LOQ: detected but below the limit of quantification (S/N<10).

| Retina | GM3      |           | GM2      |           | GD3      |           | AcGD3    |           | GD2      |           | GD1a     |           | GD1b     |           | AcGD1b   |           | GT3      |           | AcGT3    |           | GT1b     |           | AcGT1b   |           | GQ1b     |           | AcGQ1b   |           |
|--------|----------|-----------|----------|-----------|----------|-----------|----------|-----------|----------|-----------|----------|-----------|----------|-----------|----------|-----------|----------|-----------|----------|-----------|----------|-----------|----------|-----------|----------|-----------|----------|-----------|
|        | Mean (%) | Std. dev. | Mean (%) | Std. dev. | Mean (%) | Std. dev. | Mean (%) | Std. dev. | Mean (%) | Std. dev. | Mean (%) | Std. dev. | Mean (%) | Std. dev. | Mean (%) | Std. dev. | Mean (%) | Std. dev. | Mean (%) | Std. dev. | Mean (%) | Std. dev. | Mean (%) | Std. dev. | Mean (%) | Std. dev. | Mean (%) | Std. dev. |
| 34:1   | 4.96     | 0.58      | 2.52     | 0.74      | 6.36     | 1.29      | 5.92     | 0.47      | 1.33     | 0.52      | 3.14     | 0.35      | 1.04     | 0.27      | <LOQ     |           | 4.45     | 2.44      | 2.05     | 0.78      | 1.56     | 0.22      | N.D.     |           | <1%      |           | N.D.     |           |
| 36:2   | 1.59     | 0.15      | <1%      |           | 2.26     | 0.35      | 1.96     | 0.43      | <1%      |           | 3.69     | 0.40      | 0.94     | 0.36      | <1%      |           | 1.47     | 0.35      | 1.13     | 0.31      | 1.73     | 0.27      | N.D.     |           | <1%      |           | N.D.     |           |
| 36:1   | 38.74    | 2.69      | 73.92    | 2.08      | 36.43    | 2.55      | 43.75    | 5.38      | 68.89    | 1.53      | 64.68    | 2.24      | 46.38    | 3.47      | 55.72    | 6.08      | 18.81    | 2.49      | 19.25    | 1.95      | 47.92    | 3.76      | 50.67    | 5.63      | 36.72    | 6.57      | 30.79    | 4.39      |
| 37:1   | 1.17     | 0.12      | N.D.     |           | <1%      |           | N.D.     |           | N.D.     |           | N.D.     |           | N.D.     |           | N.D.     |           | N.D.     |           | N.D.     |           | N.D.     |           | N.D.     |           | N.D.     |           | N.D.     |           |
| 38:2   | 5.43     | 1.26      | <1%      |           | 2.19     | 0.50      | 1.98     | 0.53      | <1%      |           | 2.52     | 0.24      | <1%      |           | N.D.     |           | 2.14     | 0.48      | 3.81     | 1.55      | 1.23     | 0.20      | N.D.     |           | <1%      |           | N.D.     |           |
| 38:1   | 22.21    | 1.13      | 20.90    | 1.32      | 17.87    | 0.72      | 21.76    | 1.39      | 26.65    | 1.11      | 22.32    | 1.84      | 43.43    | 2.63      | 39.66    | 5.28      | 15.66    | 1.31      | 18.69    | 3.72      | 37.05    | 2.50      | 43.68    | 4.81      | 48.01    | 4.43      | 69.21    | 4.39      |
| 40:2   | 3.73     | 0.86      | <LOQ     |           | 2.06     | 0.27      | 2.87     | 0.86      | N.D.     |           | <1%      |           | <1%      |           | N.D.     |           | 3.04     | 0.64      | 2.62     | 0.48      | <LOQ     |           | N.D.     |           | <1%      |           | N.D.     |           |
| 40:1   | 11.00    | 0.96      | <1%      |           | 14.20    | 1.13      | 21.78    | 3.81      | <1%      |           | 2.38     | 0.45      | 6.30     | 0.53      | <1%      |           | 23.56    | 2.04      | 22.78    | 2.61      | 7.87     | 0.96      | 6.14     | 1.46      | 9.71     | 1.81      | N.D.     |           |
| 42:2   | 4.16     | 0.69      | N.D.     |           | 6.06     | 0.92      | N.D.     |           | N.D.     |           | <1%      |           | <1%      |           | N.D.     |           | 12.28    | 2.22      | 11.85    | 1.49      | <1%      |           | N.D.     |           | <1%      |           | N.D.     |           |
| 42:1   | 5.53     | 0.65      | N.D.     |           | 11.64    | 1.20      | N.D.     |           | N.D.     |           | <1%      |           | <1%      |           | N.D.     |           | 18.63    | 2.62      | 17.42    | 3.04      | 1.77     | 0.31      | N.D.     |           | 2.24     | 0.75      | N.D.     |           |
| others | 1.49     | 0.21      | 2.66     | 0.75      | 0.93     | 0.14      |          |           | 3.20     | 1.06      | 1.27     | 0.47      | 2.09     | 0.60      | 4.61     | 2.10      |          |           |          |           | 0.90     | 0.24      |          |           | 3.32     | 1.19      |          |           |

| RPE/Choroid | GM3      |           | GD3      |           | GD1a     |           | GD1b     |           | GT1b     |           | GQ1b     |           |
|-------------|----------|-----------|----------|-----------|----------|-----------|----------|-----------|----------|-----------|----------|-----------|
|             | Mean (%) | Std. dev. | Mean (%) | Std. dev. | Mean (%) | Std. dev. | Mean (%) | Std. dev. | Mean (%) | Std. dev. | Mean (%) | Std. dev. |
| 34:1        | 19.25    | 2.40      | 19.59    | 0.61      | 4.30     | 1.00      | 1.21     | 0.35      | 1.02     | 0.41      | N.D.     |           |
| 36:2        | 1.55     | 0.30      | 1.92     | 0.79      | <1%      |           | N.D.     |           | N.D.     |           | N.D.     |           |
| 36:1        | 19.57    | 3.29      | 17.52    | 4.70      | 9.90     | 1.94      | 38.73    | 13.75     | 29.35    | 8.51      | 31.65    | 7.01      |
| 38:2        | 1.06     | 0.13      | 1.38     | 0.35      | <1%      |           | N.D.     |           | N.D.     |           | N.D.     |           |
| 38:1        | 6.50     | 0.54      | 6.24     | 1.25      | 5.26     | 2.01      | 49.20    | 12.82     | 46.79    | 2.98      | 68.35    | 7.01      |
| 40:2        | 2.80     | 0.12      | 2.29     | 0.14      | 1.77     | 0.83      | <1%      |           | 1.17     | 1.04      | N.D.     |           |
| 40:1        | 9.35     | 0.52      | 10.40    | 1.08      | 13.24    | 1.02      | 5.22     | 1.53      | 10.18    | 2.42      | N.D.     |           |
| 41:1        | 1.56     | 0.18      | 1.23     | 0.18      | N.D.     |           | N.D.     |           | N.D.     |           | N.D.     |           |
| 42:3        | 3.43     | 0.37      | 3.21     | 0.52      | 3.22     | 0.28      | N.D.     |           | <1%      |           | N.D.     |           |
| 42:2        | 21.36    | 2.77      | 21.56    | 3.15      | 30.29    | 1.47      | 3.13     | 2.38      | 5.70     | 2.71      | N.D.     |           |
| 42:1        | 11.83    | 1.67      | 13.90    | 2.06      | 31.27    | 2.18      | <1%      |           | 5.44     | 3.00      | N.D.     |           |
| others      | 1.73     | 0.18      | 1.34     | 0.55      | 0.38     | 0.08      | 2.77     | 2.82      | 0.53     | 0.20      |          |           |

| Ciliary body | GM3      |           | GM2      |           | GD3      |           | AcGD3    |           | GD2      |           | GD1a     |           | GD1b     |           | GT1b     |           | AcGT1b   |           | GQ1b     |           |
|--------------|----------|-----------|----------|-----------|----------|-----------|----------|-----------|----------|-----------|----------|-----------|----------|-----------|----------|-----------|----------|-----------|----------|-----------|
|              | Mean (%) | Std. dev. | Mean (%) | Std. dev. | Mean (%) | Std. dev. | Mean (%) | Std. dev. | Mean (%) | Std. dev. | Mean (%) | Std. dev. | Mean (%) | Std. dev. | Mean (%) | Std. dev. | Mean (%) | Std. dev. | Mean (%) | Std. dev. |
| 32:1         | <1%      |           | N.D.     |           | <1%      |           | N.D.     |           | N.D.     |           | <1%      |           | <LOQ     |           | N.D.     |           | N.D.     |           | N.D.     |           |
| 34:2         | <1%      |           | N.D.     |           | <1%      |           | N.D.     |           | N.D.     |           | <1%      |           | <1%      |           | N.D.     |           | N.D.     |           | N.D.     |           |
| 34:1         | 17.48    | 0.47      | 25.54    | 13.66     | 23.01    | 3.84      | 32.09    | 10.26     | 14.14    | 4.78      | 16.99    | 3.52      | 19.75    | 12.42     | 15.88    | 8.38      | 34.71    | 16.00     | N.D.     |           |
| 36:2         | <1%      |           | <1%      |           | <1%      |           | N.D.     |           | N.D.     |           | 3.42     | 0.63      | <1%      |           | <1%      |           | N.D.     |           | N.D.     |           |
| 36:1         | 9.02     | 0.46      | 31.72    | 13.10     | 9.13     | 0.89      | 5.19     | 1.33      | 47.52    | 8.77      | 18.03    | 3.00      | 41.94    | 5.80      | 29.14    | 4.57      | 27.17    | 2.75      | 39.64    | 4.46      |
| 38:2         | 2.36     | 0.56      | <1%      |           | 2.57     | 0.85      | <1%      |           | N.D.     |           | 2.51     | 1.60      | <1%      |           | <1%      |           | N.D.     |           | N.D.     |           |
| 38:1         | 8.23     | 0.34      | 9.52     | 4.09      | 9.32     | 0.56      | 8.07     | 0.14      | 20.77    | 10.77     | 9.80     | 3.21      | 29.86    | 8.15      | 24.93    | 5.91      | 15.84    | 5.47      | 47.40    | 6.93      |
| 39:1         | 1.13     | 0.20      | N.D.     |           | <1%      |           | N.D.     |           | N.D.     |           | N.D.     |           | N.D.     |           | N.D.     |           | N.D.     |           | N.D.     |           |
| 40:2         | 4.88     | 0.57      | <1%      |           | 5.56     | 0.82      | 3.59     | 1.06      | N.D.     |           | 2.60     | 0.36      | <1%      |           | <1%      |           | N.D.     |           | 1.19     | 0.27      |
| 40:1         | 13.75    | 0.66      | 8.41     | 1.20      | 15.67    | 1.45      | 18.78    | 3.53      | 2.91     | 0.39      | 7.93     | 0.51      | 2.11     | 0.98      | 6.17     | 1.96      | 4.38     | 1.08      | 4.19     | 1.25      |
| 41:2         | 1.01     | 0.09      | N.D.     |           | <1%      |           | N.D.     |           | N.D.     |           | <1%      |           | <1%      |           | N.D.     |           | N.D.     |           | N.D.     |           |
| 41:1         | 2.43     | 0.15      | N.D.     |           | 1.61     | 0.40      | <1%      |           | N.D.     |           | <1%      |           | <1%      |           | <1%      |           | N.D.     |           | N.D.     |           |
| 42:3         | 4.40     | 0.41      | 1.29     | 0.32      | 3.41     | 0.41      | 2.19     | 0.54      | N.D.     |           | 3.09     | 0.98      | <1%      |           | 1.82     | 0.66      | N.D.     |           | N.D.     |           |
| 42:2         | 20.04    | 1.40      | 13.10    | 2.91      | 15.41    | 1.37      | 19.54    | 1.69      | 2.30     | 1.05      | 18.59    | 4.93      | 3.46     | 1.31      | 10.95    | 1.93      | 11.50    | 3.57      | N.D.     |           |
| 42:1         | 12.39    | 0.66      | 8.84     | 1.90      | 10.19    | 1.22      | 13.44    | 3.04      | 1.25     | 0.86      | 15.52    | 3.52      | 2.51     | 1.70      | 9.41     | 1.77      | 6.59     | 2.30      | 5.75     | 2.01      |
| others       | 2.87     | 0.18      | 2.49     | 1.08      | 4.12     | 0.56      | 1.50     | 1.21      |          |           | 1.56     | 0.81      | 2.34     | 0.92      | 2.89     | 1.53      |          |           |          |           |

| Optic Nerve | GM3      |           | GM2      |           | GD3      |           | AcGD3    |           | GD2      |           | GD1a     |           | GD1b     |           | AcGD1b   |           | GT1b     |           | AcGT1b   |           | GQ1b     |           | AcGQ1b   |           |
|-------------|----------|-----------|----------|-----------|----------|-----------|----------|-----------|----------|-----------|----------|-----------|----------|-----------|----------|-----------|----------|-----------|----------|-----------|----------|-----------|----------|-----------|
|             | Mean (%) | Std. dev. | Mean (%) | Std. dev. | Mean (%) | Std. dev. | Mean (%) | Std. dev. | Mean (%) | Std. dev. | Mean (%) | Std. dev. | Mean (%) | Std. dev. | Mean (%) | Std. dev. | Mean (%) | Std. dev. | Mean (%) | Std. dev. | Mean (%) | Std. dev. | Mean (%) | Std. dev. |
| Ceramide    |          |           |          |           |          |           |          |           |          |           |          |           |          |           |          |           |          |           |          |           |          |           |          |           |
| 34:1        | 8.28     | 1.35      | <1%      |           | 4.67     | 1.22      | 3.46     | 1.15      | <1%      |           | N.D.     |           | <1%      |           | N.D.     |           | <1%      |           | N.D.     |           | N.D.     |           | N.D.     |           |
| 36:2        | <1%      |           | <1%      |           | 1.48     | 0.61      | <1%      |           | N.D.     |           | <1%      |           | <1%      |           | N.D.     |           | N.D.     |           | N.D.     |           | N.D.     |           | N.D.     |           |
| 36:1        | 12.67    | 1.86      | 22.15    | 1.65      | 23.94    | 3.94      | 75.93    | 6.76      | 17.77    | 3.57      | 4.63     | 2.20      | 9.23     | 0.48      | 76.03    | 2.56      | 7.60     | 0.86      | 9.79     | 1.31      | 3.78     | 0.60      | 6.66     | 0.17      |
| 38:2        | <1%      |           | <1%      |           | <1%      |           | N.D.     |           | N.D.     |           | 1.90     | 1.04      | <1%      |           | N.D.     |           | N.D.     |           | N.D.     |           | N.D.     |           | N.D.     |           |
| 38:1        | 5.34     | 0.37      | 58.84    | 6.20      | 7.07     | 1.30      | 9.43     | 5.00      | 81.87    | 3.66      | 32.93    | 6.33      | 60.12    | 5.48      | 23.97    | 2.56      | 48.92    | 4.54      | 77.14    | 1.50      | 69.93    | 3.57      | 87.25    | 4.13      |
| 39:1        | <1%      |           | N.D.     |           | N.D.     |           | N.D.     |           | N.D.     |           | 2.47     | 1.19      | <1%      |           | N.D.     |           | <1%      |           | N.D.     |           | N.D.     |           | N.D.     |           |
| 40:2        | 1.67     | 0.31      | N.D.     |           | 2.05     | 0.26      | N.D.     |           | N.D.     |           | 15.03    | 3.51      | <1%      |           | N.D.     |           | <1%      |           | N.D.     |           | <1%      |           | N.D.     |           |
| 40:1        | 9.69     | 1.47      | 3.33     | 0.85      | 11.36    | 1.63      | 10.45    | 2.55      | N.D.     |           | 17.90    | 2.39      | 15.75    | 1.37      | N.D.     |           | 17.94    | 1.12      | 13.54    | 2.32      | 18.90    | 1.52      | 6.07     | 2.35      |
| 41:1        | 4.46     | 1.03      | N.D.     |           | 6.03     | 0.83      | N.D.     |           | N.D.     |           | 2.82     | 0.11      | 1.95     | 0.26      | N.D.     |           | 3.35     | 0.57      | N.D.     |           | N.D.     |           | N.D.     |           |
| 42:3        | 2.20     | 0.48      | N.D.     |           | N.D.     |           | N.D.     |           | N.D.     |           | 4.92     | 3.01      | <1%      |           | N.D.     |           | N.D.     |           | N.D.     |           | N.D.     |           | N.D.     |           |
| 42:2        | 32.01    | 2.51      | 8.64     | 3.13      | 25.70    | 0.96      | N.D.     |           | N.D.     |           | 9.33     | 3.89      | 5.39     | 1.72      | N.D.     |           | 8.35     | 1.27      | N.D.     |           | 2.27     | 0.52      | N.D.     |           |
| 42:1        | 18.03    | 0.97      | 3.91     | 1.65      | 15.75    | 1.78      | N.D.     |           | N.D.     |           | 6.30     | 2.45      | 5.42     | 1.52      | N.D.     |           | 9.10     | 1.28      | N.D.     |           | 4.84     | 1.51      | N.D.     |           |
| 43:2        | N.D.     |           | 1.57     | 0.60      | N.D.     |           | N.D.     |           | N.D.     |           | N.D.     |           | N.D.     |           | N.D.     |           | N.D.     |           | N.D.     |           | N.D.     |           | N.D.     |           |
| 43:1        | 1.61     | 0.36      | <1%      |           | <1%      |           | N.D.     |           | N.D.     |           | 1.43     | 0.54      | <1%      |           | N.D.     |           | 1.81     | 0.19      | N.D.     |           | N.D.     |           | N.D.     |           |
| 44:2        | 2.18     | 0.52      | <1%      |           | <1%      |           | N.D.     |           | N.D.     |           | <1%      |           | <1%      |           | N.D.     |           | 1.34     | 0.23      | N.D.     |           | N.D.     |           | N.D.     |           |
| others      | 1.94     | 0.34      | 2.49     | 1.03      | 1.94     | 0.32      | 0.73     | 0.88      | 0.37     | 0.23      | 1.00     | 0.36      | 2.13     | 0.52      |          |           | 1.58     | 0.12      |          |           | 0.29     | 0.09      |          |           |

| Brain  | GM3      |           | GM2      |           | GD3      |           | AcGD3    |           | GD2      |           | GD1a     |           | GD1b     |           | AcGD1b   |           | GT3      |           | AcGT3    |           | GT1b     |           | AcGT1b   |           | GQ1b     |           | AcGQ1b   |           |      |  |
|--------|----------|-----------|----------|-----------|----------|-----------|----------|-----------|----------|-----------|----------|-----------|----------|-----------|----------|-----------|----------|-----------|----------|-----------|----------|-----------|----------|-----------|----------|-----------|----------|-----------|------|--|
|        | Mean (%) | Std. dev. | Mean (%) | Std. dev. | Mean (%) | Std. dev. | Mean (%) | Std. dev. | Mean (%) | Std. dev. | Mean (%) | Std. dev. | Mean (%) | Std. dev. | Mean (%) | Std. dev. | Mean (%) | Std. dev. | Mean (%) | Std. dev. | Mean (%) | Std. dev. | Mean (%) | Std. dev. | Mean (%) | Std. dev. | Mean (%) | Std. dev. |      |  |
| 32:1   | <1%      |           | <1%      |           | N.D.     |           | N.D.     |           | N.D.     |           | N.D.     |           | N.D.     |           | N.D.     |           | N.D.     |           | N.D.     |           | N.D.     |           | N.D.     |           | N.D.     |           | N.D.     |           | N.D. |  |
| 34:1   | 4.32     | 1.12      | 2.72     | 0.85      | 2.38     | 0.35      | N.D.     |           | <1%      |           | <1%      |           | <1%      |           | N.D.     |           | N.D.     |           | N.D.     |           | <1%      |           | N.D.     |           | N.D.     |           | N.D.     |           | N.D. |  |
| 36:2   | 3.04     | 0.91      | 2.43     | 0.43      | 2.58     | 0.47      | N.D.     |           | <1%      | 0.24      | 3.24     | 0.80      | 1.45     | 0.23      | 1.41     | 0.71      | N.D.     |           | N.D.     |           | N.D.     |           | <1%      |           | 1.91     | 0.41      | N.D.     |           | N.D. |  |
| 36:1   | 56.00    | 5.24      | 62.13    | 7.54      | 69.35    | 4.10      | 9.97     | 3.82      | 57.32    | 8.03      | 46.92    | 5.85      | 44.66    | 6.45      | 43.58    | 5.34      | 84.68    | 4.78      | 46.72    | 5.25      | 51.51    | 6.52      | 43.79    | 6.20      | 52.05    | 6.35      | 51.25    | 7.52      | N.D. |  |
| 38:2   | <1%      |           | <1%      |           | <1%      |           | 19.44    | 1.79      | <1%      |           | 3.23     | 0.67      | 1.14     | 0.17      | N.D.     |           | 1.80     | 1.03      | <LOQ     |           | 1.70     | 0.10      | N.D.     |           | 1.43     | 0.26      | N.D.     |           | N.D. |  |
| 38:1   | 13.66    | 3.99      | 29.08    | 7.90      | 14.57    | 4.45      | 54.55    | 5.43      | 37.38    | 7.67      | 41.51    | 6.23      | 47.14    | 6.34      | 55.02    | 5.97      | 13.53    | 5.13      | 53.28    | 5.25      | 44.40    | 6.76      | 51.82    | 5.84      | 40.54    | 6.23      | 48.75    | 7.52      | N.D. |  |
| 40:2   | <1%      |           | <1%      |           | <1%      |           | 10.72    | 1.30      | N.D.     |           | N.D.     |           | N.D.     |           | N.D.     |           | N.D.     |           | N.D.     |           | N.D.     |           | N.D.     |           | N.D.     |           | N.D.     |           | N.D. |  |
| 40:1   | 2.59     | 1.07      | 1.23     | 0.51      | 2.47     | 0.35      | 5.31     | 1.32      | 2.57     | 0.76      | 3.80     | 0.42      | 4.24     | 0.48      | <LOQ     |           | N.D.     |           | N.D.     |           | <1%      |           | 3.56     | 0.60      | 4.11     | 0.51      | N.D.     |           | N.D. |  |
| 41:1   | 1.00     | 0.38      | N.D.     |           | N.D.     |           | N.D.     |           | N.D.     |           | N.D.     |           | N.D.     |           | N.D.     |           | N.D.     |           | N.D.     |           | N.D.     |           | N.D.     |           | N.D.     |           | N.D.     |           | N.D. |  |
| 42:2   | 12.12    | 1.62      | <1%      |           | 5.17     | 0.53      | N.D.     |           | <1%      |           | <1%      |           | <1%      |           | N.D.     |           | N.D.     |           | N.D.     |           | N.D.     |           | N.D.     |           | N.D.     |           | N.D.     |           | N.D. |  |
| 42:1   | 5.16     | 0.91      | <1%      |           | 1.94     | 0.14      | N.D.     |           | N.D.     |           | <1%      |           | <1%      |           | N.D.     |           | N.D.     |           | N.D.     |           | <1%      |           | N.D.     |           | N.D.     |           | N.D.     |           | N.D. |  |
| 43:2   | <1%      |           | N.D.     |           | N.D.     |           | N.D.     |           | N.D.     |           | N.D.     |           | N.D.     |           | N.D.     |           | N.D.     |           | N.D.     |           | N.D.     |           | N.D.     |           | N.D.     |           | N.D.     |           | N.D. |  |
| others | 2.11     | 0.33      | 1.29     | 0.39      | 1.54     | 0.23      |          |           | 2.73     | 0.47      | 1.30     | 0.21      | 1.37     | 0.24      |          |           |          |           |          |           | 2.39     | 0.33      | 0.83     | 0.21      |          |           |          |           |      |  |

| Plasma<br>Ceramide | GM3      |           | GM2      |           | GD3      |           | GD1a     |           | GD1b     |           | GT1b     |           |
|--------------------|----------|-----------|----------|-----------|----------|-----------|----------|-----------|----------|-----------|----------|-----------|
|                    | Mean (%) | Std. dev. | Mean (%) | Std. dev. | Mean (%) | Std. dev. | Mean (%) | Std. dev. | Mean (%) | Std. dev. | Mean (%) | Std. dev. |
| 32:2               | <1%      |           | N.D.     |           | <1%      |           | N.D.     |           | N.D.     |           | N.D.     |           |
| 32:1               | 2.87     | 0.40      | N.D.     |           | 4.19     | 0.98      | 3.10     | 1.74      | N.D.     |           | <1%      |           |
| 34:2               | 4.02     | 0.94      | 1.37     | 0.61      | 4.04     | 1.20      | 3.81     | 0.85      | <1%      |           | <1%      |           |
| 34:1               | 36.92    | 5.52      | 25.48    | 5.74      | 39.34    | 7.50      | 39.49    | 7.32      | 4.21     | 4.19      | 12.15    | 3.69      |
| 36:2               | 2.39     | 0.58      | 6.86     | 2.72      | 1.48     | 0.39      | 7.32     | 1.77      | <1%      |           | <1%      |           |
| 36:1               | 9.26     | 1.52      | 27.86    | 10.76     | 7.12     | 3.48      | 30.63    | 7.54      | 27.09    | 14.95     | 20.53    | 9.20      |
| 38:2               | 1.33     | 0.29      | 1.18     | 0.78      | <1%      |           | <1%      |           | <1%      |           | <1%      |           |
| 38:1               | 4.57     | 0.62      | 4.16     | 1.50      | 2.89     | 1.14      | 7.05     | 4.59      | 56.93    | 14.28     | 35.54    | 10.30     |
| 39:1               | <1%      |           | N.D.     |           | N.D.     |           | N.D.     |           | N.D.     |           | N.D.     |           |
| 40:2               | <1%      |           | 3.04     | 1.79      | 3.47     | 1.02      | <1%      |           | <1%      |           | <1%      |           |
| 40:1               | 4.30     | 0.52      | 8.65     | 3.11      | 5.07     | 1.27      | 1.10     | 0.55      | 4.49     | 1.61      | 6.39     | 1.60      |
| 41:2               | 7.78     | 0.89      | N.D.     |           | N.D.     |           | N.D.     |           | N.D.     |           | N.D.     |           |
| 41:1               | 1.21     | 0.33      | N.D.     |           | 1.15     | 0.30      | <1%      |           | <1%      |           | <1%      |           |
| 42:3               | 2.43     | 0.67      | 3.03     | 1.12      | 5.73     | 1.39      | N.D.     |           | N.D.     |           | 1.46     | 1.24      |
| 42:2               | 12.79    | 1.84      | 13.25    | 3.48      | 17.08    | 4.36      | 4.93     | 1.07      | 3.53     | 3.20      | 12.37    | 5.19      |
| 42:1               | 6.22     | 0.79      | 4.76     | 1.91      | 7.65     | 1.65      | 2.07     | 1.10      | 1.65     | 1.32      | 9.31     | 4.48      |
| 43:2               | <1%      |           | N.D.     |           | N.D.     |           | N.D.     |           | N.D.     |           | N.D.     |           |
| 43:1               | 1.42     | 0.50      | N.D.     |           | N.D.     |           | N.D.     |           | N.D.     |           | N.D.     |           |
| others             | 2.68     | 0.57      |          |           | 0.88     | 0.29      | 1.59     | 0.49      | 2.08     | 0.98      | 3.23     | 1.57      |
