# Supplementary material for: Ganglioside Profiling of the Human Retina: Comparison with Other Ocular Structures, Brain and Plasma Reveals Tissue Specificities
Source: PubMed Central journal article supplement (PMC5173345; doi:10.1371/journal.pone.0168794), 2016-12-20
Supplement: pone.0168794.s003.pdf [file pone.0168794.s003.pdf]

**S3 Table. Ceramide molecular species of the ganglioside classes of the ciliary body characterized by HRMS with the LTQ-Orbitrap mass spectrometer.** Only the main classes of this tissue (GM3 and GD3) could be characterized. Major molecular species are indicated in bold. N.D.: Non-detected. N.I.: Non-identified.

|             | <b>GM3</b>        | <b>GD3</b>        |
|-------------|-------------------|-------------------|
| <b>32:1</b> | N.I.              | <b>d18:1/14:0</b> |
| <b>34:2</b> | <b>d18:1/16:1</b> | <b>d18:1/16:1</b> |
| <b>34:1</b> | <b>d18:1/16:0</b> | <b>d18:1/16:0</b> |
| <b>36:2</b> | d16:1/20:1        |                   |
|             | d18:2/18:0        |                   |
|             | <b>d18:1/18:1</b> | <b>d18:1/18:1</b> |
| <b>36:1</b> | d16:1/20:0        | d16:1/20:0        |
|             | <b>d18:1/18:0</b> | <b>d18:1/18:0</b> |
| <b>38:2</b> | d18:2/20:0        | d18:2/20:0        |
|             | <b>d18:1/20:1</b> | <b>d18:1/20:1</b> |
| <b>38:1</b> | <b>d18:1/20:0</b> | <b>d18:1/20:0</b> |
| <b>39:1</b> | d17:1/22:0        |                   |
|             | <b>d18:1/21:0</b> | <b>d18:1/21:0</b> |
| <b>40:3</b> | d18:2/22:1        | N.D.              |
|             | <b>d18:1/22:2</b> |                   |
| <b>40:2</b> | d18:2/22:0        | d18:2/22:0        |
|             | <b>d18:1/22:1</b> | <b>d18:1/22:1</b> |
| <b>40:1</b> | <b>d18:1/22:0</b> | <b>d18:1/22:0</b> |
| <b>41:2</b> | <b>d18:1/23:1</b> | <b>d18:1/23:1</b> |
| <b>41:1</b> | d17:1/24:0        |                   |
|             | <b>d18:1/23:0</b> | <b>d18:1/23:0</b> |
| <b>42:3</b> | d17:0/25:3        |                   |
|             | d18:2/24:1        | d18:2/24:1        |
|             | <b>d18:1/24:2</b> | <b>d18:1/24:2</b> |
| <b>42:2</b> | d17:0/25:2        |                   |
|             | d18:2/24:0        | d18:2/24:0        |
|             | <b>d18:1/24:1</b> | <b>d18:1/24:1</b> |
| <b>42:1</b> | <b>d18:1/24:0</b> | <b>d18:1/24:0</b> |
