# Supplementary material for: Ganglioside Profiling of the Human Retina: Comparison with Other Ocular Structures, Brain and Plasma Reveals Tissue Specificities
Source: PubMed Central journal article supplement (PMC5173345; doi:10.1371/journal.pone.0168794), 2016-12-20
Supplement: pone.0168794.s004.pdf [file pone.0168794.s004.pdf]

**S4 Table. Ceramide molecular species of the ganglioside classes of the optic nerve characterized by HRMS with the LTQ-Orbitrap mass spectrometer.** We were not able to characterize any molecular species in AcGD3, GD2, GD1a, AcGT1b, GQ1b and AcGQ1b. Major molecular species are indicated in bold. N.D.: Non-detected. N.I.: Non-identified.

|             | <b>GM3</b>        | <b>GM2</b>        | <b>GD3</b>        | <b>GD1b</b>       | <b>GT1b</b>       |
|-------------|-------------------|-------------------|-------------------|-------------------|-------------------|
| <b>34:1</b> | <b>d18:1/16:0</b> | N.I.              | <b>d18:1/16:0</b> | N.I.              | N.I.              |
| <b>36:2</b> | <b>d18:1/18:1</b> | N.I.              | <b>d18:1/18:1</b> | <b>d18:1/18:1</b> | N.D.              |
| <b>36:1</b> | <b>d18:1/18:0</b> | N.I.              | <b>d18:1/18:0</b> | <b>d18:1/18:0</b> | N.I.              |
| <b>38:2</b> | d18:2/20:0        | N.I.              |                   |                   | N.D.              |
|             | <b>d18:1/20:1</b> |                   | <b>d18:1/20:1</b> |                   |                   |
|             | <b>d20:1/18:1</b> |                   | d20:1/18:1        | <b>d20:1/18:1</b> |                   |
| <b>38:1</b> | <b>d18:1/20:0</b> | N.I.              | <b>d18:1/20:0</b> |                   | N.I.              |
|             | <b>d20:1/18:0</b> |                   | d20:1/18:0        | <b>d20:1/18:0</b> |                   |
| <b>39:1</b> | <b>d18:1/21:0</b> | N.D.              | N.D.              | N.D.              | N.I.              |
|             | d20:1/19:0        |                   |                   |                   |                   |
| <b>40:2</b> | <b>d18:1/22:1</b> | N.D.              | <b>d18:1/22:1</b> | N.D.              | N.I.              |
| <b>40:1</b> | <b>d18:1/22:0</b> | N.I.              | <b>d18:1/22:0</b> |                   | <b>d18:1/22:0</b> |
|             |                   |                   |                   | <b>d20:1/20:0</b> |                   |
| <b>41:1</b> | <b>d18:1/23:0</b> | N.D.              | <b>d18:1/23:0</b> | <b>d18:1/23:0</b> | N.I.              |
|             | d20:1/21:0        |                   |                   |                   |                   |
| <b>42:3</b> | <b>d18:1/24:2</b> | N.D.              | N.D.              | <b>d18:1/24:2</b> | N.D.              |
| <b>42:2</b> | <b>d18:1/24:1</b> | <b>d18:1/24:1</b> | <b>d18:1/24:1</b> | <b>d18:1/24:1</b> | N.I.              |
|             |                   |                   | d20:1/22:1        |                   |                   |
| <b>42:1</b> | <b>d18:1/24:0</b> | <b>d18:1/24:0</b> | <b>d18:1/24:0</b> | <b>d18:1/24:0</b> | N.I.              |
|             |                   |                   | d20:1/22:0        |                   |                   |
| <b>43:2</b> | N.D.              | <b>d18:1/25:1</b> | N.D.              | N.D.              | N.D.              |
| <b>43:1</b> | <b>d18:1/25:0</b> | N.I.              | <b>d18:1/25:0</b> | N.I.              | N.I.              |
|             | d20:1/23:0        |                   |                   |                   |                   |
| <b>44:2</b> | <b>d18:1/26:1</b> | N.I.              | d18:1/26:1        | N.I.              | N.I.              |
|             |                   |                   | <b>d20:1/24:1</b> |                   |                   |
