# Supplementary material for: Ganglioside Profiling of the Human Retina: Comparison with Other Ocular Structures, Brain and Plasma Reveals Tissue Specificities
Source: PubMed Central journal article supplement (PMC5173345; doi:10.1371/journal.pone.0168794), 2016-12-20
Supplement: pone.0168794.s006.pdf [file pone.0168794.s006.pdf]

**S6 Table. Ceramide molecular species of the plasma ganglioside classes characterized by HRMS with the LTQ-Orbitrap mass spectrometer.** Only the main classes of this tissue (GM3, GM2 and GD3) could be characterized. Major molecular species are indicated in bold. N.D.: Non-detected. N.I.: Non-identified.

|      | GM3               | GM2               | GD3               |
|------|-------------------|-------------------|-------------------|
| 32:2 | d16:1/16:1        | N.D.              |                   |
|      | d17:1/15:1        |                   |                   |
|      | <b>d18:1/14:1</b> |                   | <b>d18:1/14:1</b> |
| 32:1 | <b>d16:1/16:0</b> | N.D.              | <b>d16:1/16:0</b> |
|      | d17:1/15:0        |                   |                   |
|      | <b>d18:1/14:0</b> |                   | <b>d18:1/14:0</b> |
| 34:2 |                   | d16:1/18:1        |                   |
|      | d18:2/16:0        |                   | d18:2/16:0        |
|      | <b>d18:1/16:1</b> | <b>d18:1/16:1</b> | <b>d18:1/16:1</b> |
| 34:1 |                   | d16:1/18:1        |                   |
|      | <b>d18:1/16:0</b> | <b>d18:1/16:0</b> | <b>d18:1/16:0</b> |
| 36:2 | d16:1/20:1        |                   |                   |
|      | d18:2/18:0        | d18:2/18:0        | d18:2/18:0        |
|      | <b>d18:1/18:1</b> | <b>d18:1/18:1</b> | <b>d18:1/18:1</b> |
| 36:1 | d16:1/20:0        |                   |                   |
|      | <b>d18:1/18:0</b> | <b>d18:1/18:0</b> | <b>d18:1/18:0</b> |
| 38:2 | d16:1/22:1        |                   |                   |
|      | d18:2/20:0        |                   |                   |
|      | <b>d18:1/20:1</b> | <b>d18:1/20:1</b> | <b>d18:1/20:1</b> |
| 38:1 | d16:1/22:0        |                   |                   |
|      | <b>d18:1/20:0</b> | <b>d18:1/20:0</b> | <b>d18:1/20:0</b> |
| 39:1 | d16:1/23:0        | N.D.              | N.D.              |
|      | <b>d18:1/21:0</b> |                   |                   |
| 40:3 | d16:1/24:2        | N.D.              | N.D.              |
|      | d17:1/23:2        |                   |                   |
|      | d18:2/22:1        |                   |                   |
|      | <b>d18:1/22:2</b> |                   |                   |
| 40:2 | d16:1/24:1        |                   | d16:1/24:1        |
|      | d18:2/22:0        |                   | d18:2/22:0        |
|      | <b>d18:1/22:1</b> | <b>d18:1/22:1</b> | <b>d18:1/22:1</b> |
| 40:1 | d16:1/24:0        | N.I.              | d16:1/24:0        |
|      | <b>d18:1/22:0</b> |                   | <b>d18:1/22:0</b> |
| 41:2 | d18:2/23:0        | N.D.              | N.D.              |
|      | <b>d18:1/23:1</b> |                   |                   |
| 41:1 | d17:1/24:0        | N.D.              | d17:1/24:0        |
|      | <b>d18:1/23:0</b> |                   | <b>d18:1/23:0</b> |
| 42:3 | N.D.              | d18:2/24:1        | d18:2/24:1        |
|      |                   | <b>d18:1/24:2</b> | <b>d18:1/24:2</b> |
| 42:2 | d17:0/25:1        |                   |                   |
|      | d18:2/24:0        | d18:2/24:0        | d18:2/24:0        |
|      | <b>d18:1/24:1</b> | <b>d18:1/24:1</b> | <b>d18:1/24:1</b> |
| 42:1 | <b>d18:1/24:0</b> | <b>d18:1/24:0</b> | <b>d18:1/24:0</b> |
| 43:2 | d17:0/26:2        | N.D.              | N.D.              |
|      | d18:2/25:0        |                   |                   |
|      | <b>d18:1/25:1</b> |                   |                   |
| 43:1 | d17:0/26:1        | N.D.              | N.D.              |
|      | <b>d18:1/25:0</b> |                   |                   |
